# Supplementary material for: Inhibition of Hepatitis C Virus in Mice by a Small Interfering RNA Targeting a Highly Conserved Sequence in Viral IRES Pseudoknot
Source: PubMed Central journal article supplement (PMC4713436; doi:10.1371/journal.pone.0146710), 2016-01-11
Supplement: pone.0146710.s002.pdf [file pone.0146710.s002.pdf]

**S1 Table. Multiple sequence alignment of the HCV IRES region spanning nts 301–341**

| Genotype | Name        | Sequence <sup>a</sup>                                      | GenBank No | Clone No |
|----------|-------------|------------------------------------------------------------|------------|----------|
| 1a       | H77         | GUGCUUGCGAGUGCCCCG <b>GGAGGUCUCGUAGACCGUGCACC</b>          | NC_004102  | 139      |
|          | US.BID-V182 | GUGCUUGCGAGUGCCCCG <b>GGAGGUCUCGUAGACCGUGCAAC</b>          | EU234064   | 2        |
|          | HEC278830   | GUGCUUGCGAGUGCCCCG <b>GGAGGUCUCGUAGACCGUGCAUC</b>          | AJ278830   | 1        |
|          | US.BID-V411 | <b>CGUGCAC</b> CGAGUGCCCCG <b>GGAGGUCUCGUAGACCGUGCACC</b>  | EU155311   | 1        |
| 1a/2a    | WO0075338-9 | GUGCUUGCGAGUGCCCCG <b>GGAGGUCUCGUAGACCGUGCACC</b>          | AX057094   | 1        |
| 1b/2k    | RJ.N687     | GUGCUUGCGAGUGCCCCG <b>GGAGGUCUCGUAGACCGUGCAUC</b>          | AY587845   | 1        |
| 1b       | Con1        | GUGCUUGCGAGUGCCCCG <b>GGAGGUCUCGUAGACCGUGCACC</b>          | AJ238799   | 183      |
|          | CN.AY587016 | GUGCUUGCGAGUGCCCCG <b>GGAGGUCUCGUAGACCGUGCAUC</b>          | AY587016   | 38       |
|          | JP.MD6-675  | GUGCUUGCGAGUGCCCCG <b>GGAGGUCUCGUAGACCGUGCAAC</b>          | AF165056   | 1        |
|          | US.BID-V341 | <b>GCGCUUGCGAGUGCCCCG</b> <b>GGAGGUCUCGUAGACCGUGCACC</b>   | EU155300   | 1        |
|          | MD27        | GUGCUUGCGAGUGCCCCG <b>GGAGGUCUCGUAGUCGUGCAUC</b>           | AF207768   | 1        |
|          | JP.MD9-1012 | GUGCUUGCGAG <b>AG</b> CCCCG <b>GGAGGUCUCGUAGACCGUGCAUC</b> | AF165062   | 1        |
|          | MD26        | GUGCUUGCGAG <b>G</b> CCCCG <b>GGAGGUCUCGUAGUCGUGCAC</b>    | AF207767   | 1        |
| 1c       | IN.Khajal   | GUGCUUGCGAGUGCCCCG <b>GGAGGUCUCGUAGACCGUGCACC</b>          | AY651061   | 3        |
| 1        | GQ.AJ851228 | GUGCUUGCGAGUGCCCCG <b>GGAGGUCUCGUAGACCGUGCACC</b>          | AJ851228   | 1        |
| 2a       | JP.AY746460 | GUGCUUGCGAGUGCCCCG <b>GGAGGUCUCGUAGACCGUGCACC</b>          | AY746460   | 9        |
|          | G2AK1       | GUGCUUGCGAGUGCCCCG <b>GGAGGUCUCGUAGACCGUGCAUC</b>          | AF169003   | 4        |
|          | JFH-1       | <b>GCGCUUGCGAGUGCCCCG</b> <b>GGAGGUCUCGUAGACCGUGCACC</b>   | AB047639   | 1        |
| 2b       | JP.MD2b1-2  | GUGCUUGCGAGUGCCCCG <b>GGAGGUCUCGUAGACCGUGCAUC</b>          | AY232731   | 12       |
|          | JPUT971017  | GUGCUUGCGAGUGCCCCG <b>GGAGGUCUCGUAGACCGUGCACC</b>          | AB030907   | 1        |
| 2c       | BEBE1       | GUGCUUGCGAGUGCCCCG <b>GGAGGUCUCGUAGACCGUGCAUC</b>          | D50409     | 1        |
| 2k       | MD.VAT96    | GUGCUUGCGAGUGCCCCG <b>GGAGGUCUCGUAGACCGUGCACC</b>          | AB031663   | 1        |
| 3a       | DE.HCVCENS1 | GUGCUUGCGAGUGCCCCG <b>GGAGGUCUCGUAGACCGUGCAAC</b>          | X76918     | 3        |
|          | K3A         | <b>GCGCUUGCGAGUGCCCCG</b> <b>GGAGGUCUCGUAGACCGUGUAAC</b>   | D28917     | 1        |
| 3b       | JP.HCV-Tr   | GUGCUUGCGAGUGCCCCG <b>GGAGGUCUCGUAGACCGUGCAAC</b>          | D49374     | 2        |
| 3k       | ID.JK049    | GUGCUUGCGAGUGCCCCG <b>GGAGGUCUCGUAGACCGUGCAUC</b>          | D63821     | 1        |
| 4a       | EG.ED43     | GUGCUUGCGAGUGCCCCG <b>GGAGGUCUCGUAGACCGUGCACC</b>          | Y11604     | 9        |
| 4d       | 03-18       | GUGCUUGCGAGUGCCCCG <b>GGAGGUCUCGUAGACCGUGCACC</b>          | DQ418786   | 2        |
| 5a       | GB.EUH1480  | GUGCUUGCGAGUGCCCCG <b>GGAGGUCUCGUAGACCGUGCACC</b>          | Y13184     | 2        |
|          | ZA.SA13     | GUGCUUGCGAGUGCCCCG <b>GGAGGUCUCGUAGACCGUGCAAC</b>          | AF064490   | 1        |
| 6a       | HK.6a35     | GUGCUUGCGAGUGCCCCG <b>GGAGGUCUCGUAGACCGUGCAUC</b>          | DQ480513   | 13       |
|          | HK.6a33     | GUGCUUGCGAGUGCCCCG <b>GGAGGUCUCGUAGACCGUGCAUC</b>          | AY859526   | 1        |
|          | HK.6a74     | GUGCUUGCGAGUGCCCCG <b>GGAGGUCUCGUAGACCGUGCAUC</b>          | DQ480524   | 1        |
| 6b       | Th580       | GUGCUUGCGAGUGCCCCG <b>GGAGGUCUCGUAGACCGUGCAAC</b>          | NC_009827  | 1        |
| 6c       | TH.Th846    | GUGCUUGCGAGUGCCCCG <b>GGAGGUCUCGUAGACCGUGCAUC</b>          | EF424629   | 1        |
| 6d       | VN.VN235    | GUGCUUGCGAGUGCCCCG <b>GGAGGUCUCGUAGACCGUGCAUC</b>          | D84263     | 1        |
| 6e       | CN.GX004    | GUGCUUGCGAGUGCCCCG <b>GGAGGUCUCGUAGACCGUGCAUC</b>          | DQ314805   | 1        |
| 6f       | TH.C-0044   | GUGCUUGCGAGUGCCCCG <b>GGAGGUCUCGUAGACCGUGCAUC</b>          | DQ835760   | 2        |
| 6g       | HK.HK6554   | GUGCUUGCGAGUGCCCCG <b>GGAGGUCUCGUAGACCGUGCAUC</b>          | DQ314806   | 2        |
| 6h       | VN.VN004    | GUGCUUGCGAGUGCCCCG <b>GGAGGUCUCGUAGACCGUGCAUC</b>          | D84265     | 1        |
| 6i       | TH.C-0159   | GUGCUUGCGAGUGCCCCG <b>GGAGGUCUCGUAGACCGUGCAUC</b>          | DQ835762   | 1        |
|          | TH.Th602    | GUGCUUGCGAGUGCCCCG <b>GGAGGUCUCGUAGACCGUGCAUC</b>          | DQ835770   | 1        |
| 6j       | TH.C-0667   | GUGCUUGCGAGUGCCCCG <b>GGAGGUCUCGUAGACCGUGCAUC</b>          | DQ835761   | 2        |
| 6k       | CN.KM41     | GUGCUUGCGAGUGCCCCG <b>GGAGGUCUCGUAGACCGUGCACC</b>          | DQ278893   | 1        |
|          | CN.KM45     | GUGCUUGC <b>A</b> AGUGCCCCG <b>GGAGGUCUCGUAGACCGUGCACC</b> | DQ278891   | 1        |
|          | VN.VN405    | GUGCUUGCGAGUGCCCCG <b>GGAGGUCUCGUAGACCGUGCAAC</b>          | D84264     | 1        |
| 6l       | US.537796   | GUGCUUGCGAGUGCCCCG <b>GGAGGUCUCGUAGACCGUGCAUC</b>          | EF424628   | 1        |
| 6m       | TH.B4/92    | GUGCUUGCGAGUGCCCCG <b>GGAGGUCUCGUAGACCGUGCACC</b>          | DQ835767   | 2        |
|          | TH.C-0185   | GUGCUUGCGAGUGCCCCG <b>GGAGGUCUCGUAGACCGUGCAAC</b>          | DQ835765   | 1        |
|          | TH.C-0192   | GUGCUUGCGAGUGCCCCG <b>GGAGGUCUCGUAGACCGUGCAUC</b>          | DQ835766   | 1        |
| 6n       | CN.KM42     | GUGCUUGCGAGUGCCCCG <b>GGAGGUCUCGUAGACCGUGCAAC</b>          | AY878652   | 2        |
| 6o       | CA.QC227    | GUGCUUGCGAGUGCCCCG <b>GGAGGUCUCGUAGACCGUGCAAC</b>          | EF424627   | 1        |
| 6p       | CA.QC216    | GUGCUUGCGAGUGCCCCG <b>GGAGGUCUCGUAGACCGUGCAUC</b>          | EF424626   | 1        |
| 6q       | CA.QC99     | GUGCUUGCGAGUGCCCCG <b>GGAGGUCUCGUAGACCGUGCAAC</b>          | EF424625   | 1        |
| 6        | CN.GZ52557  | GUGCUUGCGAGUGCCCCG <b>GGAGGUCUCGUAGACCGUGCAUC</b>          | DQ278892   | 1        |
| 7        | CA.QC69     | GUGCUUGCGAGUGCCCCG <b>GGAGGUCUCGUAGACCGUGCACC</b>          | EF108306   | 1        |

<sup>a</sup>A total of 468 HCV sequences available on the HCV database web server (<http://hcv.lanl.gov/content/index>) operated by Los Alamos National Security were analyzed to align the IRES region, spanning nts 301–341, by using ALIGN0 and QuickAlign v1 programs provided by the server. Five clones representing 1.02% of aligned sequences showed a single nucleotide change, with two clones harboring a C to U change that can still make a G:U wobble base-pairing with siIE22 guide strand. The siIE22 target is shown in blue and the residues not conserved among the aligned sequences are shown in red.
